# Supplementary material for: The occurrence of immune-related adverse events is an independent risk factor both for serum HBsAg increase and HBV reactivation in HBsAg-positive cancer patients receiving PD-1 inhibitor combinational therapy
Source: Front Immunol. 2024 Mar 15;15:1330644. doi: 10.3389/fimmu.2024.1330644 (PMC10979302; doi:10.3389/fimmu.2024.1330644)
Supplement: Supplementary file 2 [file Table_1.xlsx]

## Sheet: Supplementary Table 1
Supplementary Table 1 Clinical characteristics of patients with HBV reactivation during PD-1 inhibitor combinational therapy
	Patient 1	Patient 2	Patient 3	Patient 4	Patient 5	Patient 6	Patient 7	Patient 8	Patient 9	Patient 10	Patient 11
Age	61	57	60	73	58	62	53	29	59	43	58
Gender (male, female)	Male	Male	Male	Male	Male	Female	Male	Male	Male	Female	Male
Cancer type	Liver cancer	Liver cancer	Liver cancer	Liver cancer	Esophagus cancer	Liver	Liver	Liver	Liver	Liver	Liver
Liver cirrhosis (yes/no)	Yes	Yes	Yes	Yes	No	Yes	Yes	Yes	Yes	Yes	Yes
HBeAg status (seronegative/Seropositive)	Seronegative	Seronegative	Seropositive	Seronegative	Seronegative	Seronegative	Seronegative	Seronegative	Seronegative	Seronegative	Seronegative
Baseline serum HBsAg (IU/ml)	34.6	2164	95.2	53.47	164.22	5.7796	225.055	141.701	4976	0.0887	20.2
Baseline HBV-DNA level (IU/ml)	Not detected	<20	1.79×103	<20	Not detected	<100	<100	29	7.40×102	<100	Not detected
Peak HBV-DNA level (IU/ml)	1.21×106	4.29×103	1.94×105	1.27×104	8.24×103	2.22×105	1.26×104	3.54×103	2.54×108	<100	Not detected
Prior use of antiviral therapy (yes/no)	Yes	No	Yes	Yes	Yes	Yes	Yes	Yes	Yes	Yes	Yes
Cycles of PD-1 inhibitor	12	23	3	9	6	4	7	8	13	5	2
Weeks to achieve HBVr	35.71	81.29	7	28.57	36.43	21.00	4.57	29.57	47.29	33.57	17.14
Occurrence of irAEs before HBVr	Rash	－	Thombocytopenia Fever Hypertension	Hypophysitis	－	－	－	－	Fever Diarrhea	－	Rash
Exposure to steroid (yes/no)	Yes	No	No	Yes	No	No	No	No	No	No	No
PD-1 inhibitor type	Sintilimab	Camrelizumab Tislelizumab	Camrelizumab	Camrelizumab	Camrelizumab	Sintilimab	Sintilimab	Sintilimab	Tislelizumab	Sintilimab	Sintilimab Tislelizumab
Antiviral therapy	TDF	ETV	TDF, TAF	TDF	TDF	TDF	ETV	TDF	TDF	ETV	ETV
Combined therapies	TACE Apatinib, Lenvatinib	Lenvatinib TACE	Apatinib Oncolytic virotherapy	Apatinib	Chemotherapy	Anlotinib	Anlotinib, Lenvatinib	Lenvatinib, Regorafenib TACE	Lenvatinib, Regorafenib TACE, HAIC	Lenvatinib TACE	Donafenib TACE
HBeAg seroconversion (yes/no)	－	－	No	－	No	－	－	－	－	－	－
Anti-HBs seroconversion (yes/no)	No	No	No	No	No	No	No	No	No	No	No
HBV-related Hepatitis (yes/no)	Yes	No	No	No	No	Yes	No	No	Yes	No	No
HBeAg, hepatitis B envelop antigen; HBsAg, hepatitis B surface antigen; PD-1, programmed cell death protein-1; HBVr, HBV reactivation; TACE, transcatheter arterial chemoembolization; HAIC, HAIC, hepatic arterial infusion chemotherapy; ETV, Entecavir; TDF, Tenofovir disoprox fumarate; TAF, Tenofovir alafenamide fumarate.

## Sheet: Supplementary Table 2
Supplementary Table 2 The overall occurrence of immune-related adverse events
	All-grade	G1/G2	G3/G4
Rash	12 (6.67%)	10 (5.56%)	2 (1.11%)
Hepatitis	9 (5.00%)	4 (2.22%)	5 (2.78%)
Fever	4 (2.22%)	4 (2.22%)	0
Hypothyroidism	4 (2.22%)	4 (2.22%)	0
Hypophysitis	3 (1.67%)	1 (0.56%)	2 (1.11%)
Thombocytopenia	2 (1.11%)	0	2 (1.1%)
Myocarditis	2 (1.11%)	1 (0.56%)	1 (0.56%)
Diarrhea	2 (1.11%)	2 (1.11%)	0
Pancreatitis	1 (0.56%)	1 (0.56%)	0
Hypertension	1 (0.56%)	1 (0.56%)	0
Arthritis	1 (0.56%)	1 (0.56%)	0
Pruritus	1 (0.56%)	0	1 (0.56%)
Colitis	1 (0.56%)	1 (0.56%)	0
Hyperthyroidism	1 (0.56%)	1 (0.56%)	0
Cystitis	1 (0.56%)	1 (0.56%)	0
